# Supplementary material for: Ni3Co/G alloy as an earth-abundant robust and stable electrocatalyst for the hydrogen evolution reaction
Source: Royal Society of Chemistry journal article supplement (doi:10.1039/c7nj00364a), 2017-01-01
Supplement: c7nj00364a1.pdf [file c7nj00364a1.pdf]

## Supporting Information

### **Ni<sub>3</sub>Co/G alloy as an earth-abundant robust and stable electrocatalyst for hydrogen evolution reaction (HER)**

Soumen Saha<sup>a</sup>, Kaisnath Ojha<sup>a</sup>, Manu Sharma<sup>a</sup> and Ashok K. Ganguli<sup>a,b\*</sup>

<sup>a</sup> Department of Chemistry, Indian Institute of Technology, Hauz Khas, New Delhi 110016, India

<sup>b</sup> Institute of Nano Science and Technology, Mohali, Punjab 160062

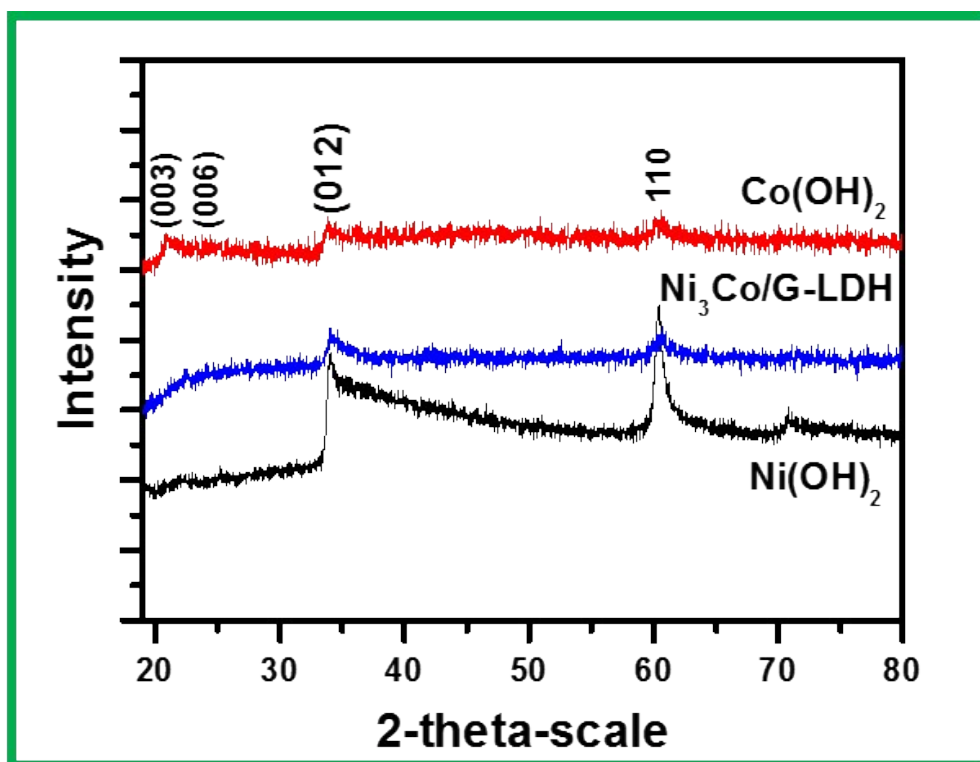

**Figure S1:** Powder X-ray diffraction patterns of Ni(OH)<sub>2</sub>, Co(OH)<sub>2</sub> and Ni<sub>3</sub>Co/G-LDH.

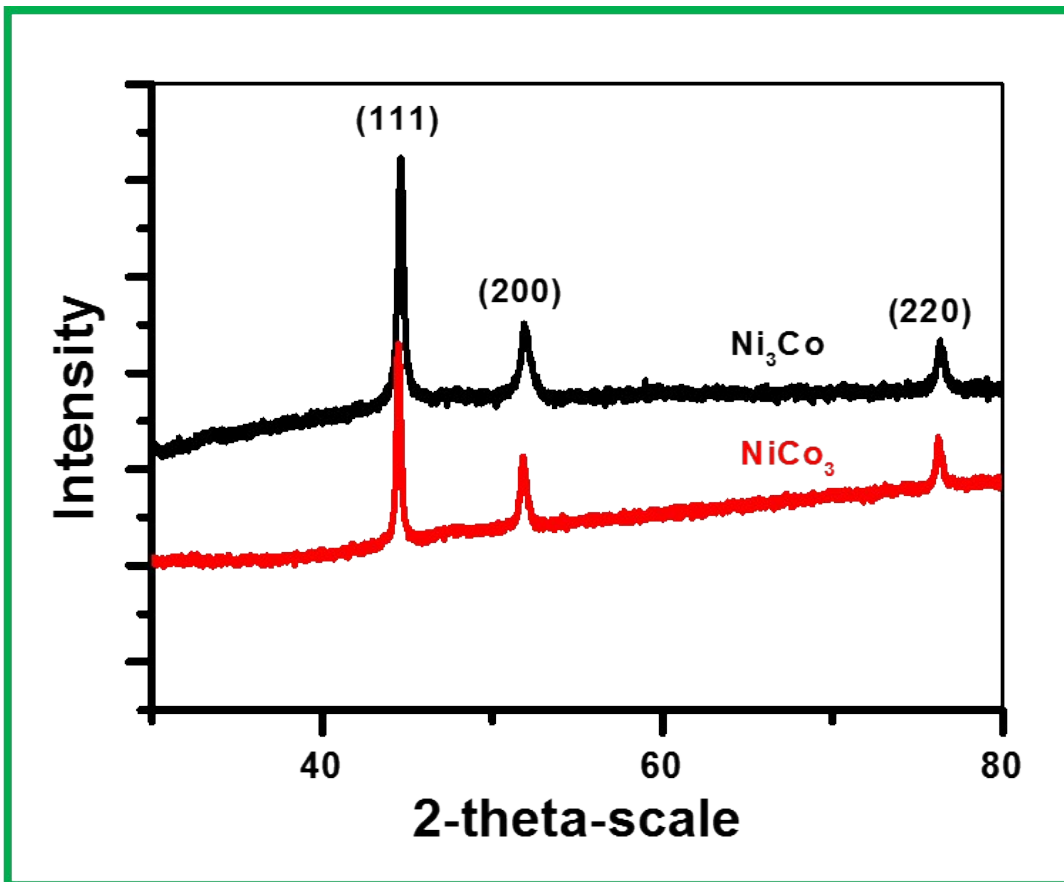

Figure S2: Powder X-ray diffraction patterns of  $\text{Ni}_3\text{Co}$  and  $\text{NiCo}_3$  alloy nanoparticles.

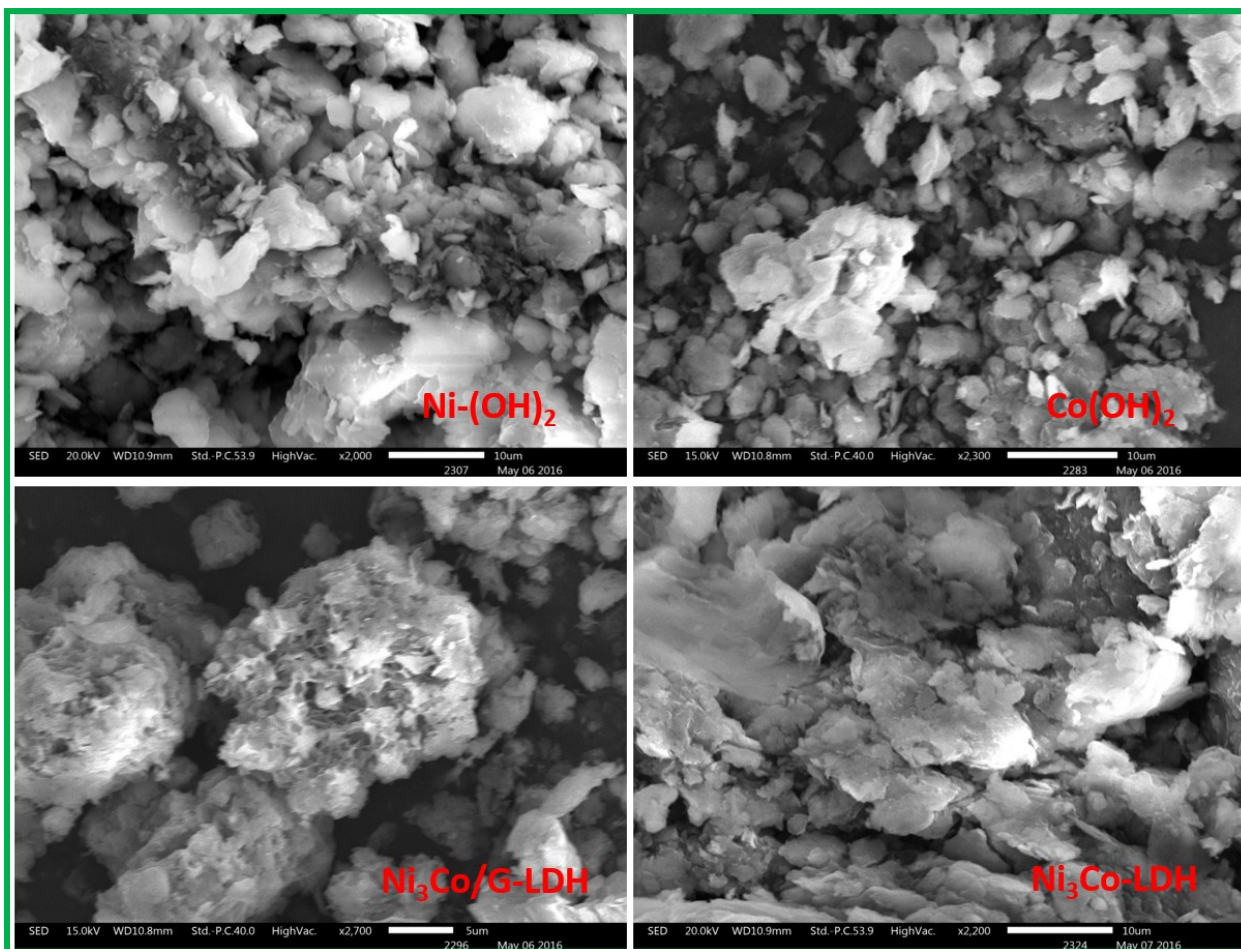

Figure S3: FESEM images of  $\text{Ni(OH)}_2$ ,  $\text{Co(OH)}_2$ ,  $\text{Ni}_3\text{Co/G-LDH}$  and  $\text{Ni}_3\text{Co-LDH}$  nanoparticles.

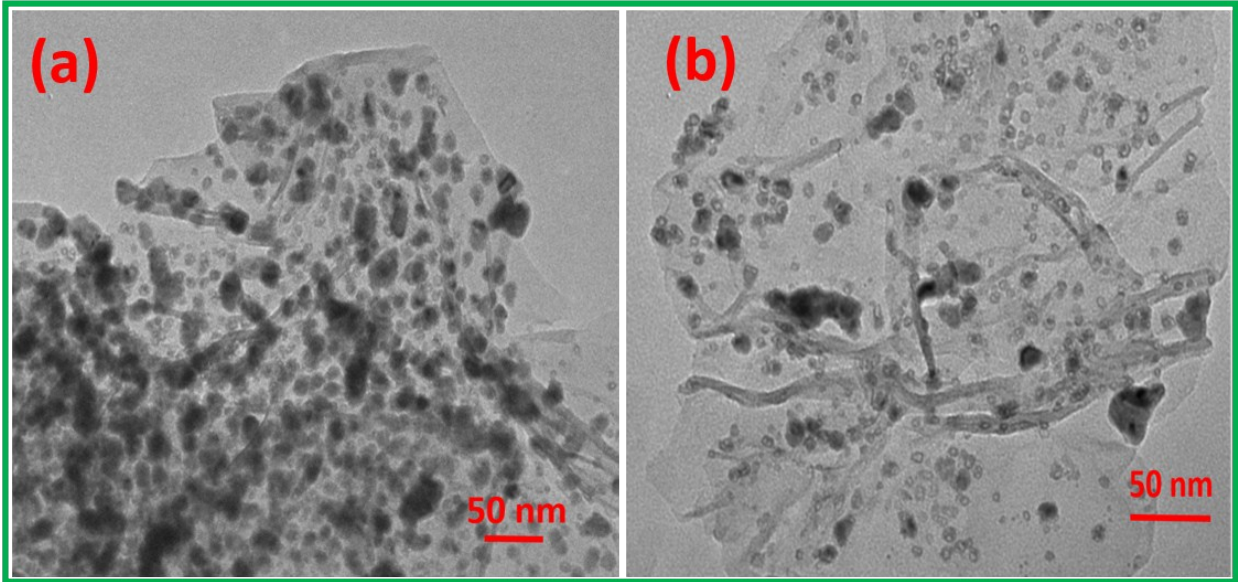

Figure S4: TEM images of Ni<sub>3</sub>Co/G alloy nanoparticles before (a) and after (b) 16h of chronopotentiometric study.

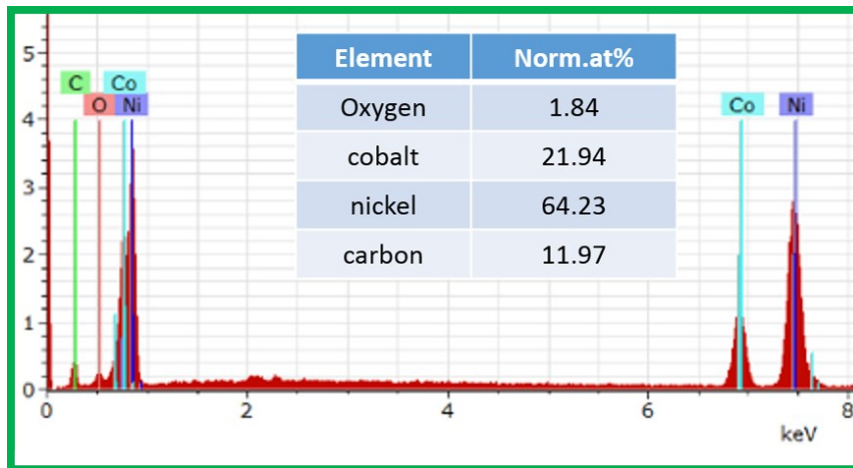

Figure S5: SEM-EDS composition of Ni<sub>3</sub>Co/G alloy nanoparticles after 16h of chrono study.

**Table S1.** Comparison of HER performances of Ni<sub>3</sub>Co/G alloy with other non-noble-metal electrocatalyst in alkaline media

| Catalyst                                                        | Current density<br>(j, mA cm <sup>-2</sup> ) | Overpotential at<br>the corresponding<br>j(mV) | Ref       |
|-----------------------------------------------------------------|----------------------------------------------|------------------------------------------------|-----------|
| Ni <sub>3</sub> Co/G                                            | 10                                           | 95                                             | This work |
| MoS <sub>2</sub> /graphene/Ni                                   | 1                                            | 170                                            | 1         |
| NiMoN                                                           | 10                                           | 109                                            | 2         |
| CoO <sub>x</sub> /CN                                            | 10                                           | 270                                            | 3         |
| porous Co phosphide/phosphate film                              | 10                                           | ~380                                           | 4         |
| FeP nanosheet <sup>a</sup>                                      | 10                                           | 240                                            | 5         |
| cobalt-phosphorous derived film                                 | 10                                           | 94                                             | 6         |
| NiO/Ni-CNT                                                      | 10                                           | <100                                           | 7         |
| Co <sub>9</sub> S <sub>8</sub> @MoS <sub>2</sub> /CNFs          | 10                                           | 190                                            | 8         |
| Co/Co <sub>3</sub> O <sub>4</sub> core/shell nanosheets         | 20                                           | 129                                            | 9         |
| U-CNT-900                                                       | 10                                           | 240                                            | 10        |
| CuMoS <sub>4</sub> crystal <sup>b</sup>                         | 2                                            | 135                                            | 11        |
| Co-NRCNT                                                        | 10                                           | 370                                            | 12        |
| Co-NCNT/CC                                                      | 10                                           | 180                                            | 13        |
| Ni-Mo alloy/Ti                                                  | 10                                           | <100                                           | 14        |
| NiS <sub>2</sub> /CC                                            | 10                                           | 149                                            | 15        |
| bulk Mo <sub>2</sub> C                                          | 10                                           | 192                                            | 16        |
| Co <sub>0.6</sub> Mo <sub>1.4</sub> N <sub>2</sub> <sup>c</sup> | 10                                           | 200                                            | 17        |
| MoC <sub>x</sub> nano-octahedrons                               | 10                                           | 150                                            | 18        |

|                                    |    |     |    |
|------------------------------------|----|-----|----|
| Ni <sub>2</sub> P nanoparticles    | 10 | 230 | 19 |
| Ni <sub>3</sub> S <sub>2</sub> /NF | 10 | 123 | 20 |
| WP <sub>2</sub> submicroparticles  | 10 | 153 | 21 |
| WP NA/CC                           | 10 | 150 | 22 |
| NiSe/ NF                           | 10 | 96  | 23 |
| CoP/CC                             | 10 | 209 | 24 |

a= in H<sub>2</sub>SO<sub>4</sub>; b= in pH 7 phosphate buffer; c= in 0.1 M HClO<sub>4</sub>

### References:

- 1 X. Geng, W. Wu, N. Li, W. Sun, J. Armstrong, A. Al-hilo, M. Brozak, J. Cui and T. Chen, *Adv. Funct. Mater.*, 2014, **24**, 6123–6129.
- 2 Y. Zhang, B. Ouyang, J. Xu, S. Chen, R. S. Rawat and H. J. Fan, *Adv. Energy Mater.*, 2016, 10.1002/aenm.201600221.
- 3 H. Jin, J. Wang, D. Su, Z. Wei, Z. Pang and Y. Wang, *JACS*, 2015, **137**, 2688–2694.
- 4 Y. Yang, H. Fei, G. Ruan and J. M. Tour, *Adv. Mater.*, 2015, **27**, 3175–3180.
- 5 Y. Xu, R. Wu, J. Zhang, Y. Shi and B. Zhang, *Chem. Commun.*, 2013, **49**, 6656–8.
- 6 N. Jiang, B. You, M. Sheng and Y. Sun, *Angew. Chemie - Int. Ed.*, 2015, **54**, 6251–6254.
- 7 M. Gong, W. Zhou, M. Tsai, J. Zhou, M. Guan, M. Lin, B. Zhang, Y. Hu, D. Wang, J. Yang, S. J. Pennycook, B. Hwang and H. Dai, *Nat. Commun.*, 2014, 10.1038/ncomms5695.
- 8 H. Zhu, J. Zhang, R. Yanzhang, M. Du, Q. Wang, G. Gao, J. Wu, G. Wu, M. Zhang and B. Liu, *Adv. Mater.*, 2015, **27**, 4752–4759.
- 9 X. Yan, L. Tian, M. He and X. Chen, *Nano Lett.*, 2015, **15**, 6015–6021.
- 10 S. Gao, G.-D. Li, Y. Liu, H. Chen, L.-L. Feng, Y. Wang, M. Yang, D. Wang, S. Wang and X. Zou, *Nanoscale*, 2015, **7**, 2306–2316.
- 11 P. D. Tran, M. Nguyen, S. S. Pramana, A. Bhattacharjee, S. Y. Chiam, J. Fize, M. J. Field, V. Artero, L. H. Wong, J. Loo and J. Barber, *Energy Environ. Sci.*, 2012, **5**, 8912–8916.
- 12 X. Zou, X. Huang, A. Goswami, R. Silva, B. R. Sathe, E. Mikmeková and T. Asefa, *Angew. Chemie - Int. Ed.*, 2014, **53**, 4372–4376.

- 13 Z. Xing, Q. Liu, W. Xing, A. M. Asiri and X. Sun, *ChemSusChem*, 2015, 10.1002/cssc.201500138.
- 14 J. R. Mckone, B. F. Sadtler, C. A. Werlang, N. S. Lewis and H. B. Gray, *ACS Catal.*, 2013, **3**, 166–169.
- 15 C. Tang, Z. Pu, Q. Liu, A. M. Asiri and X. Sun, *Electrochim. Acta*, 2015, **153**, 508–514.
- 16 H. Vrubel and X. Hu, *Angew. Chemie - Int. Ed.*, 2012, **51**, 12703–12706.
- 17 B. Cao, G. M. Veith, J. C. Neuefeind, R. R. Adzic and P. G. Khalifah, *J. Am. Chem. Soc.*, 2013, **135**, 19186–19192.
- 18 H. Bin Wu, B. Y. Xia, L. Yu, X.-Y. Yu and X. W. (David) Lou, *Nat. Commun.*, 2015, 10.1038/ncomms7512.
- 19 L. Feng, H. Vrubel, M. Bensimon and X. Hu, *Phys. Chem. Chem. Phys.*, 2014, **16**, 5917–5921.
- 20 C. Tang, Z. Pu, Q. Liu, A. M. Asiri, Y. Luo and X. Sun, *Int. J. Hydrogen Energy*, 2015, **40**, 4727–4732.
- 21 Z. Xing, Q. Liu, A. M. Asiri and X. Sun, *ACS Catal.*, 2015, **5**, 145–149.
- 22 Z. Pu, Q. Liu, A. M. Asiri and X. Sun, *ACS Appl. Mater. Interfaces*, 2014, **6**, 21874–21879.
- 23 C. Tang, N. Cheng, Z. Pu, W. Xing and X. Sun, *Angew. Chemie - Int. Ed.*, 2015, **54**, 9351–9355.
- 24 J. Tian, Q. Liu, A. M. Asiri and X. Sun, *J. Am. Chem. Soc.*, 2014, **136**, 7587–7590.
